# Supplementary material
Source: PubMed Central journal article supplement (PMC2831768)

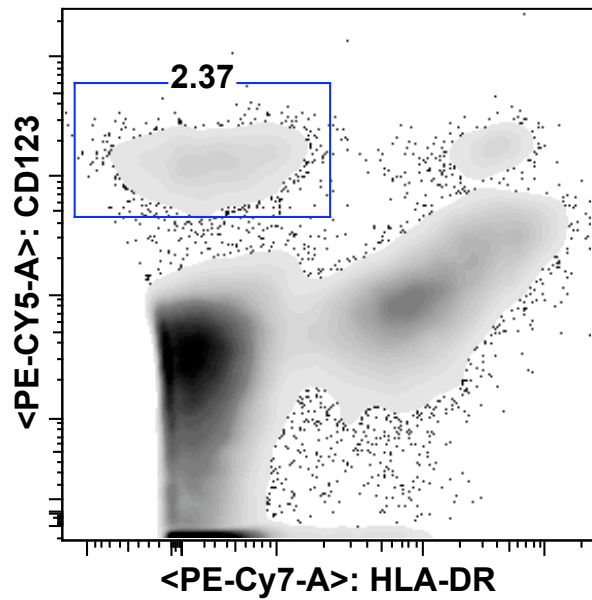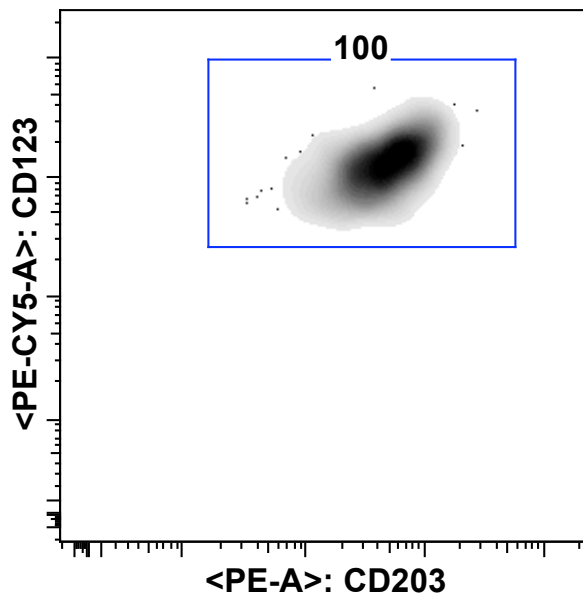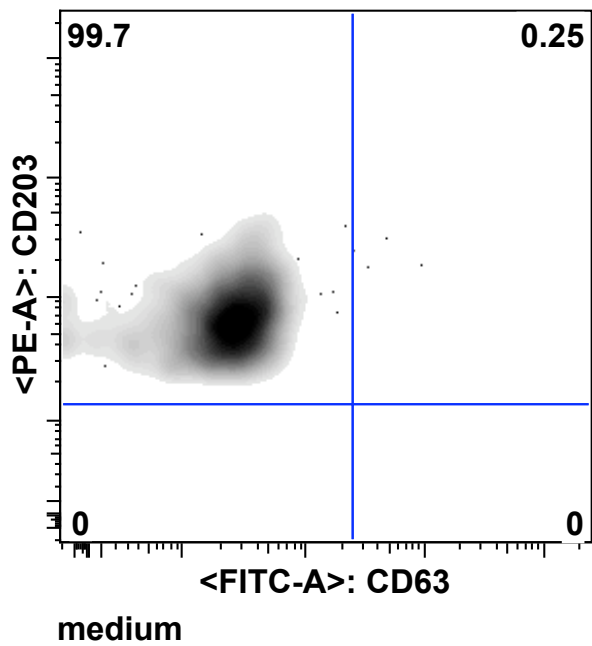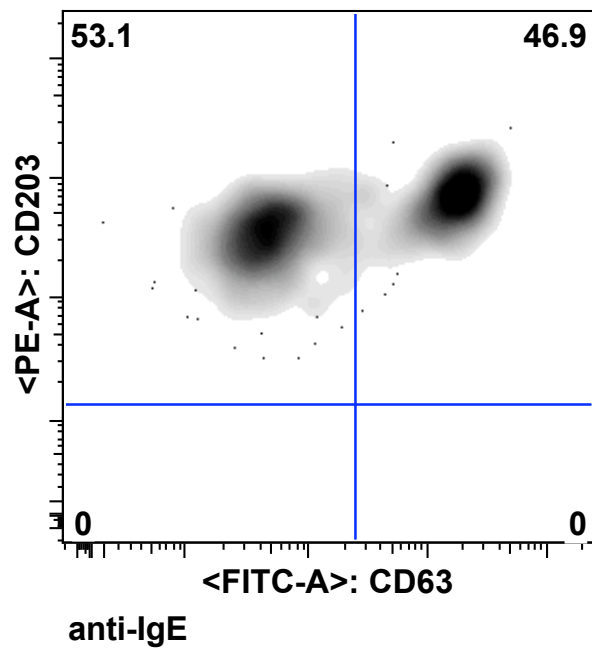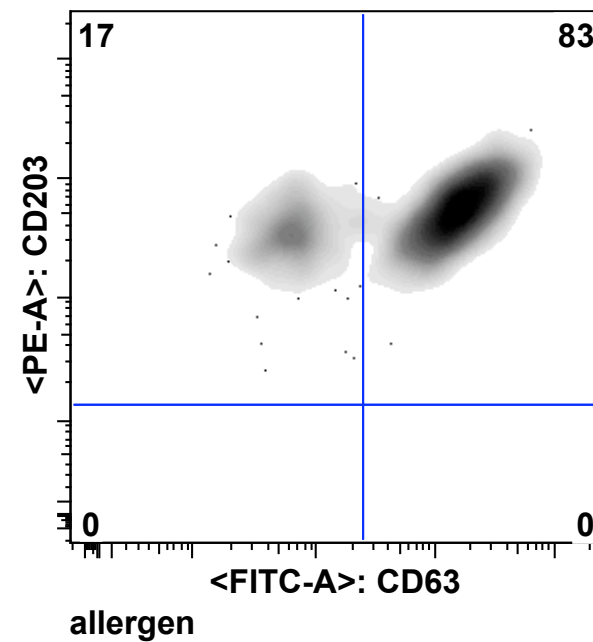

Supplement: NIHMS109169-supplement-02.pdf [file NIHMS109169-supplement-02.pdf]

PST mm wheel

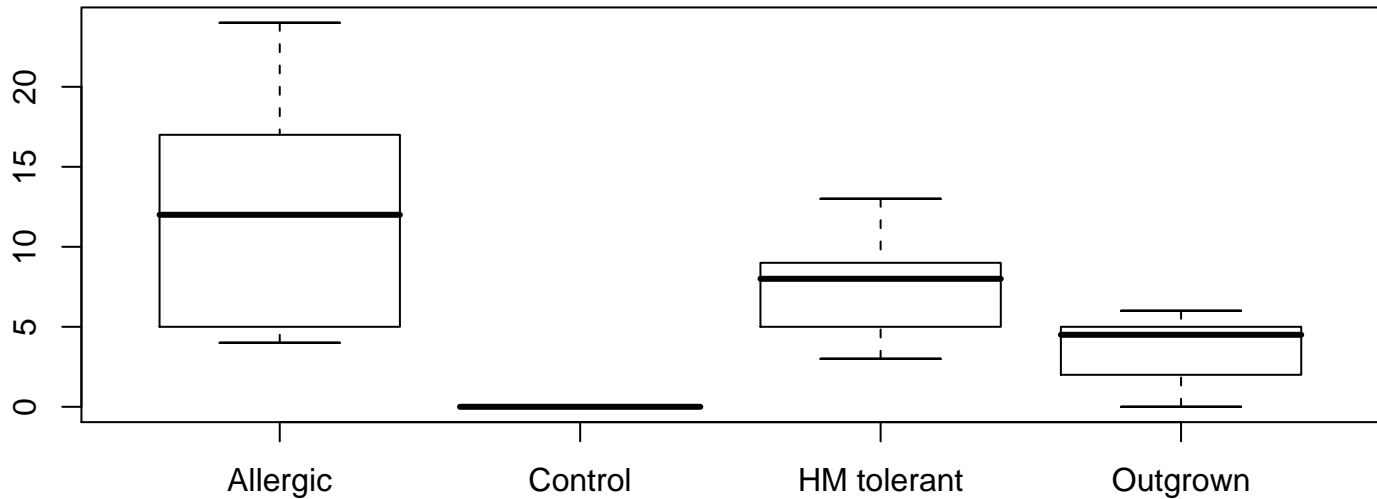

Supplement: NIHMS109169-supplement-03.pdf [file NIHMS109169-supplement-03.pdf]

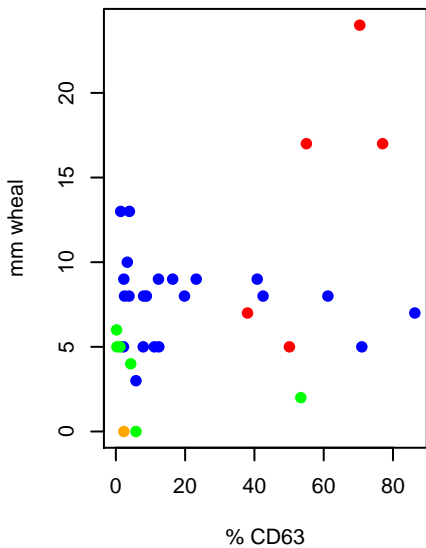

E1

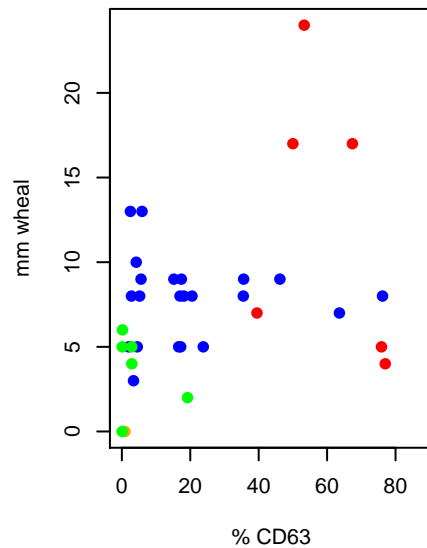

E2

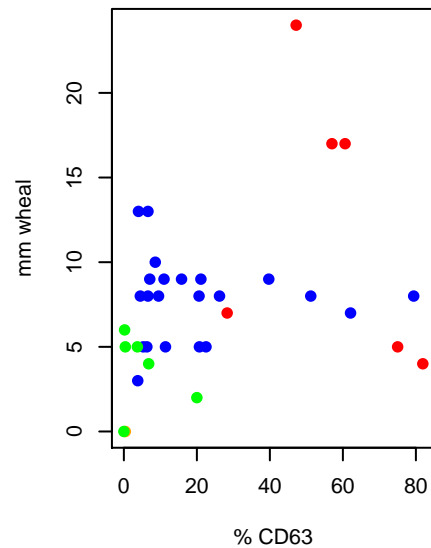

E3

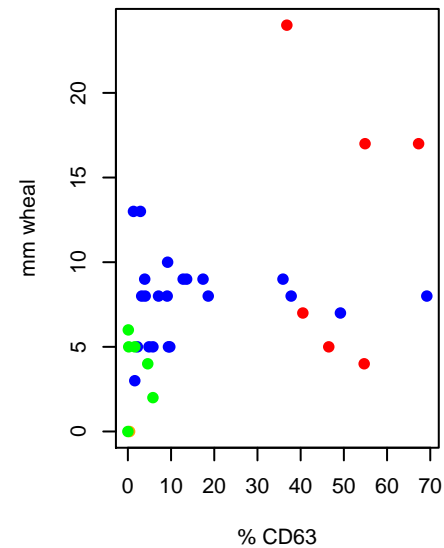

E4

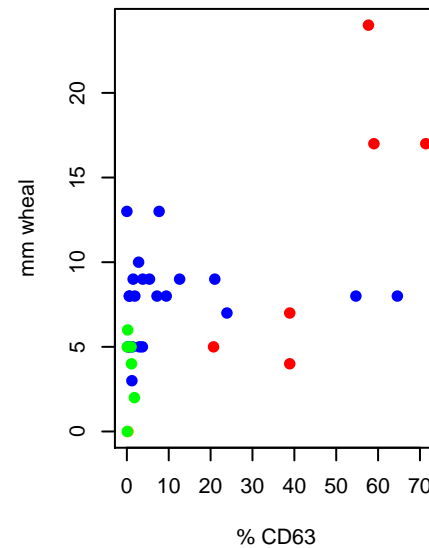

E5

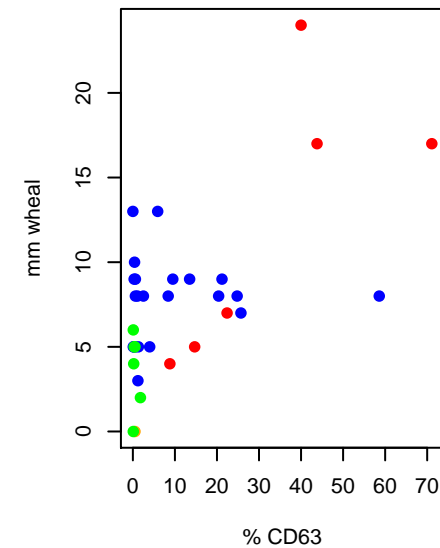

E6

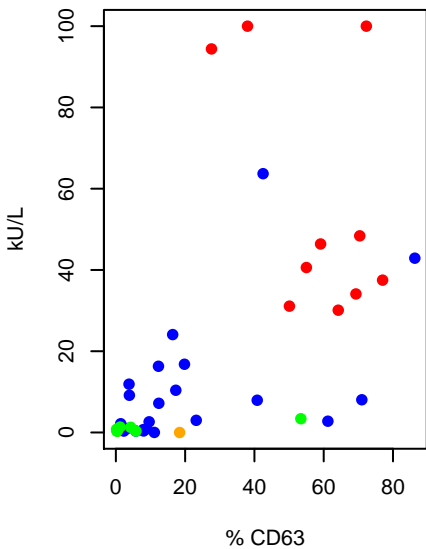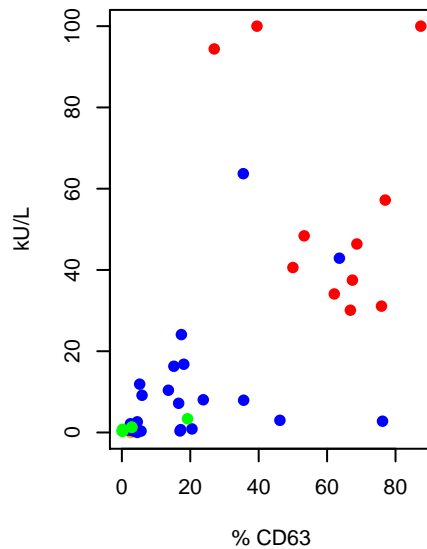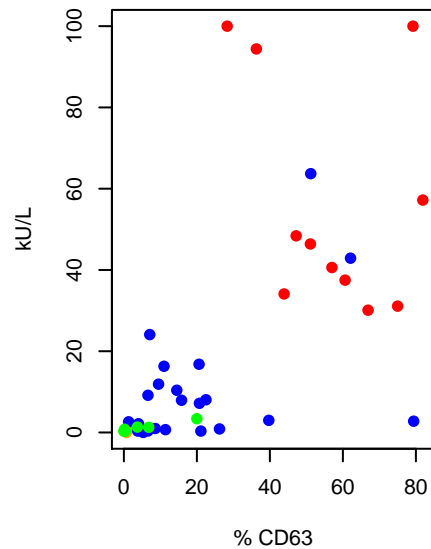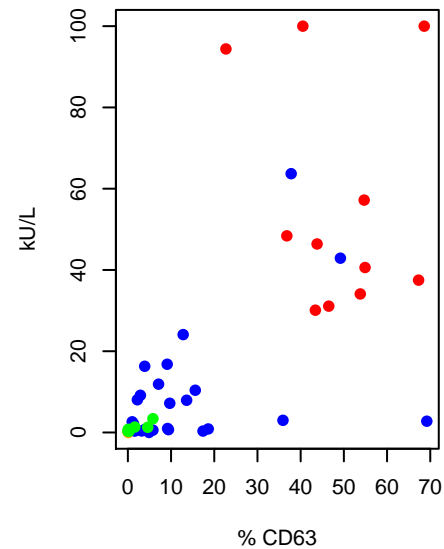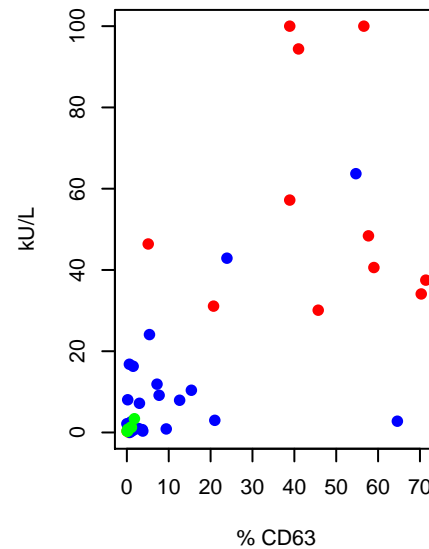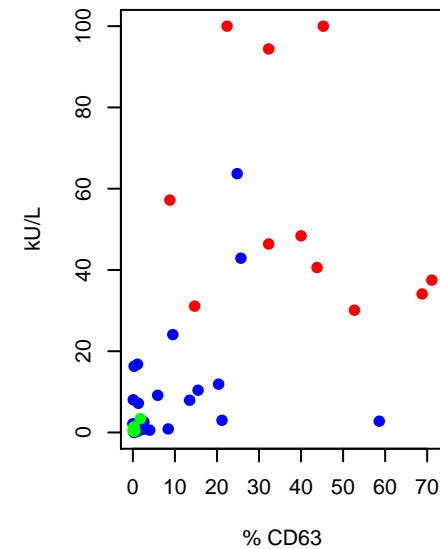

Supplement: NIHMS109169-supplement-04.pdf [file NIHMS109169-supplement-04.pdf]

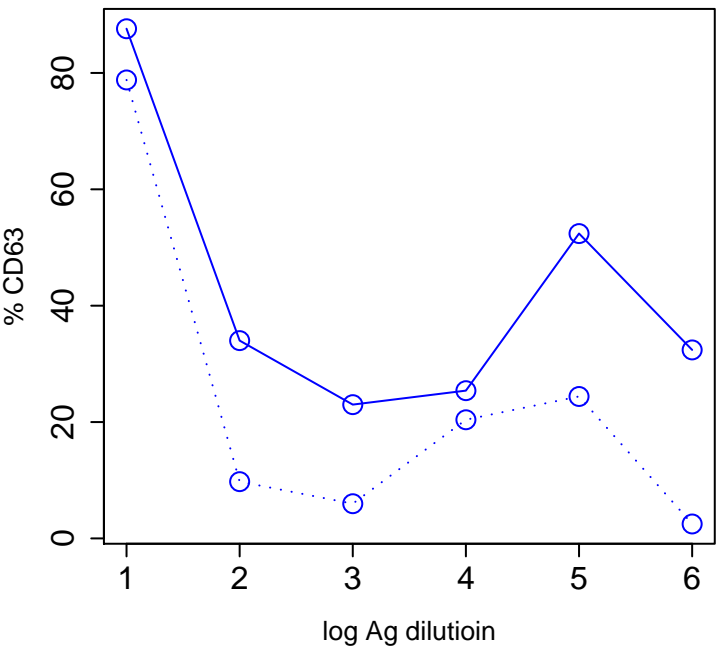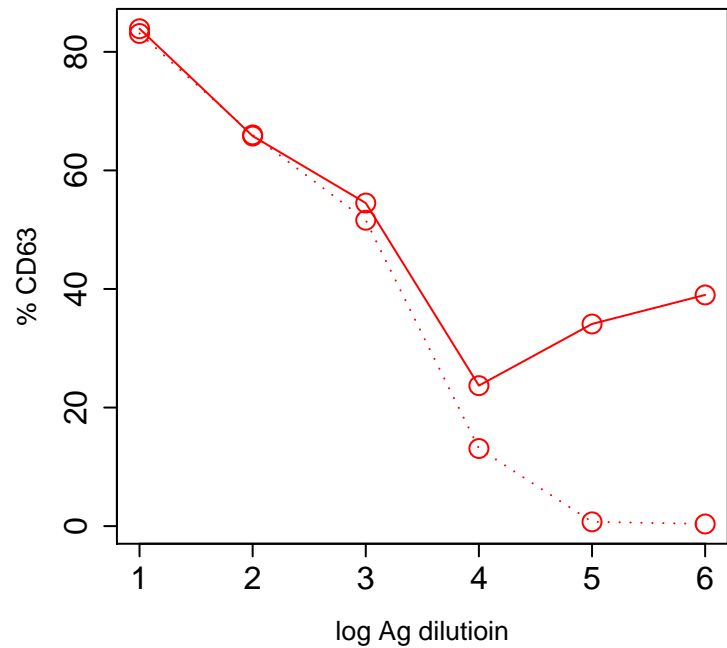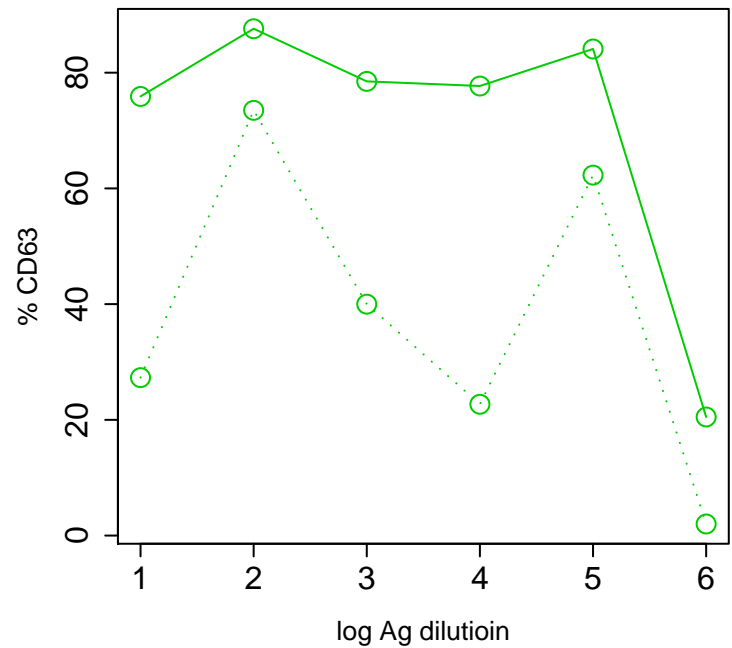

Supplement: NIHMS109169-supplement-05.pdf [file NIHMS109169-supplement-05.pdf]

# IL-3

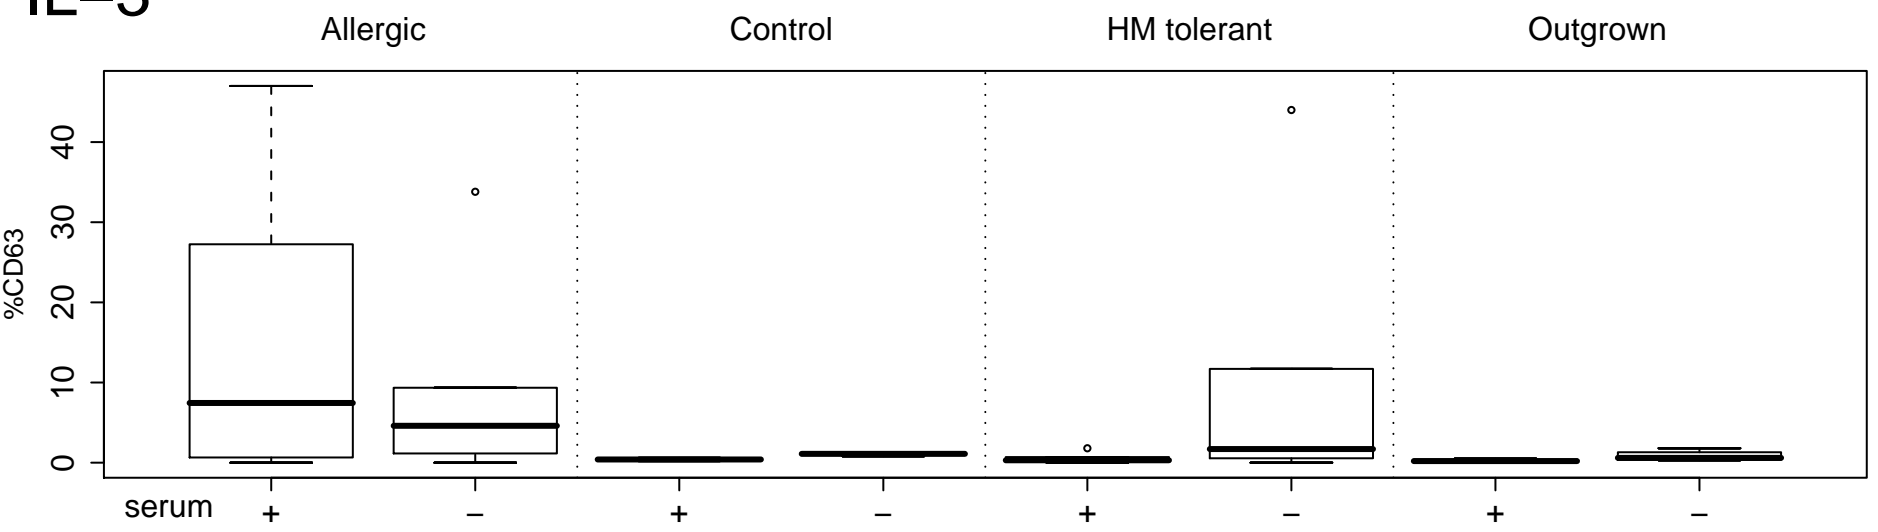

# anti-IgE

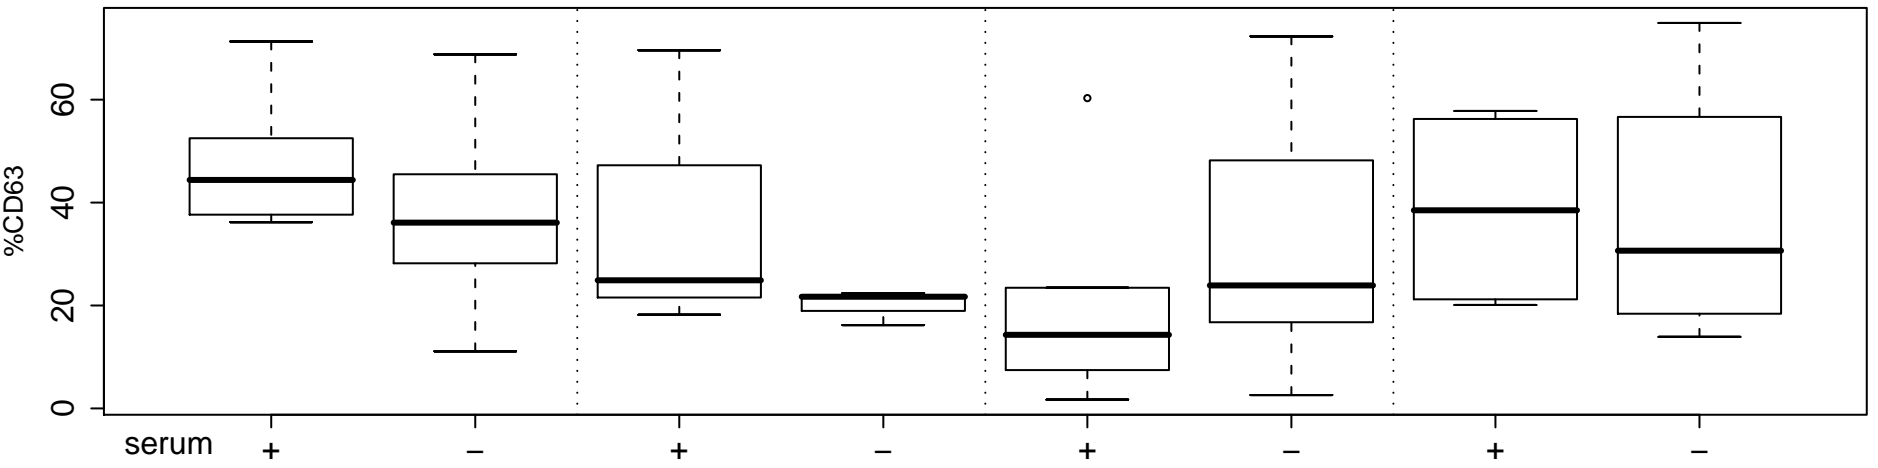

# fMLP

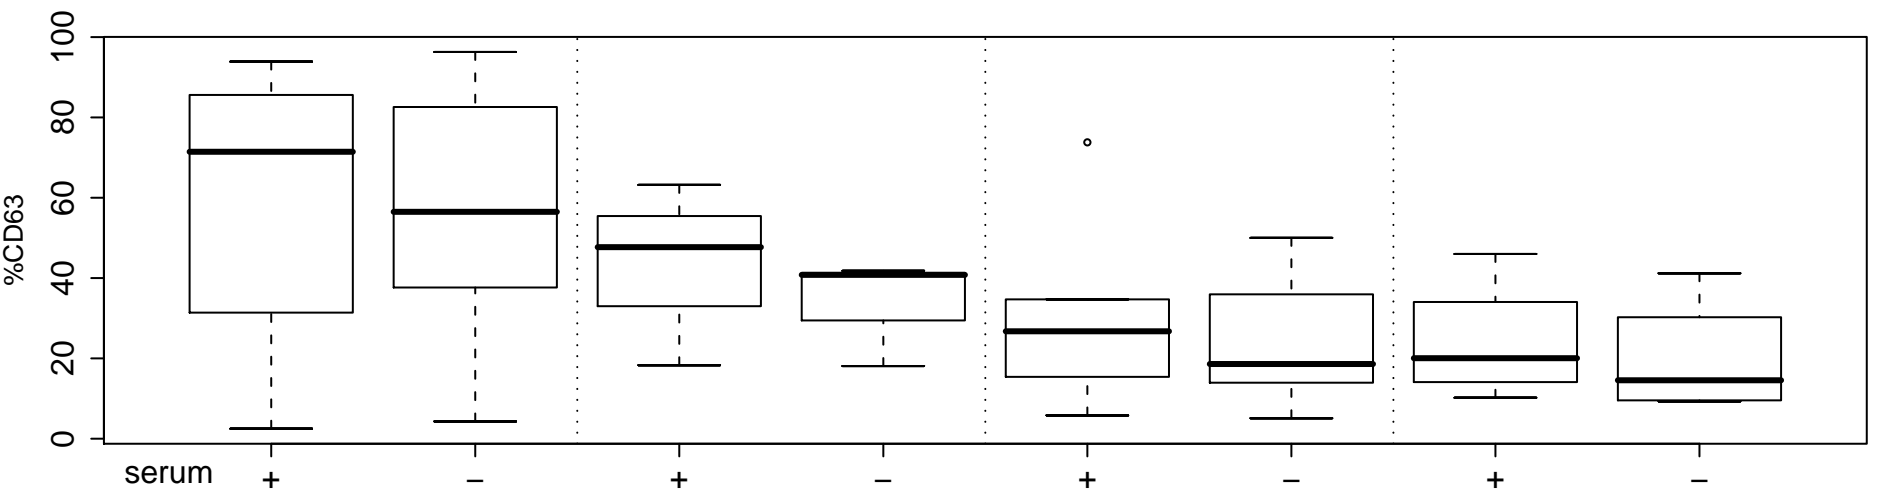

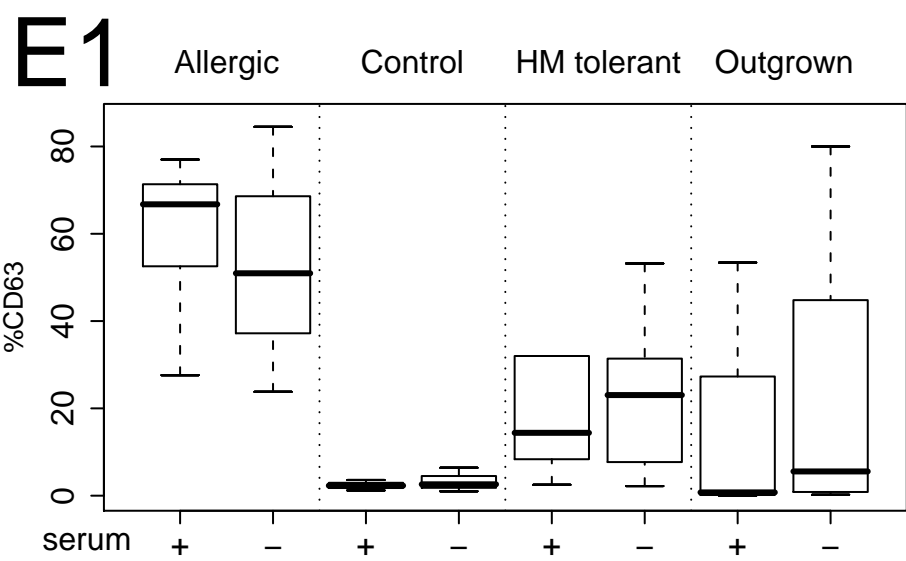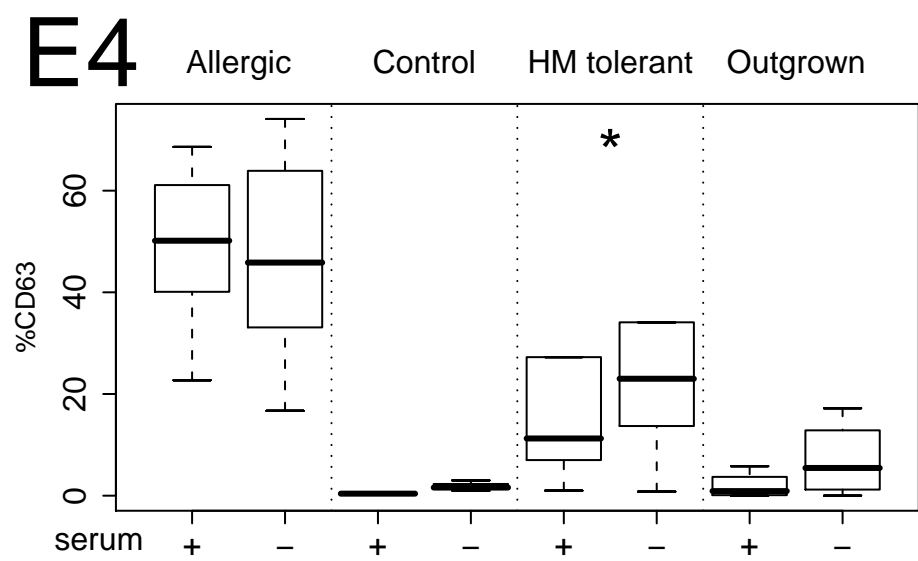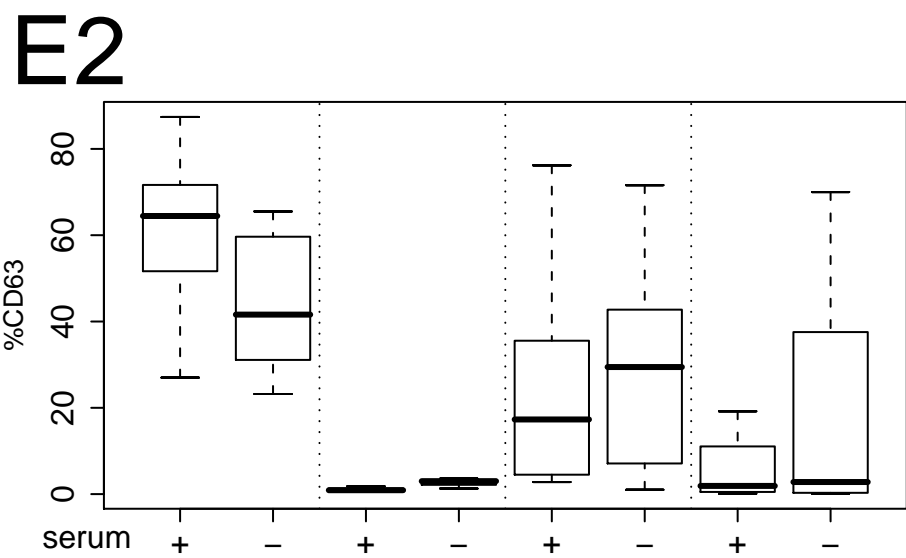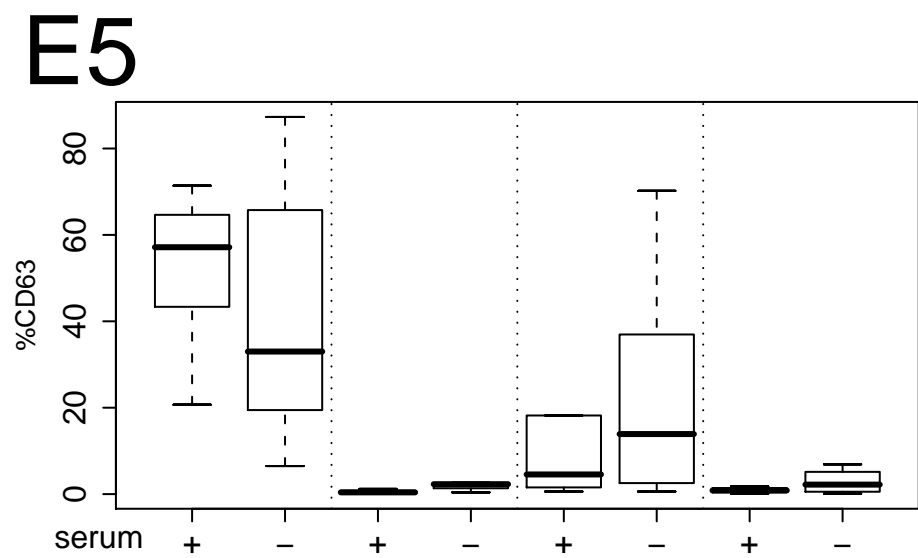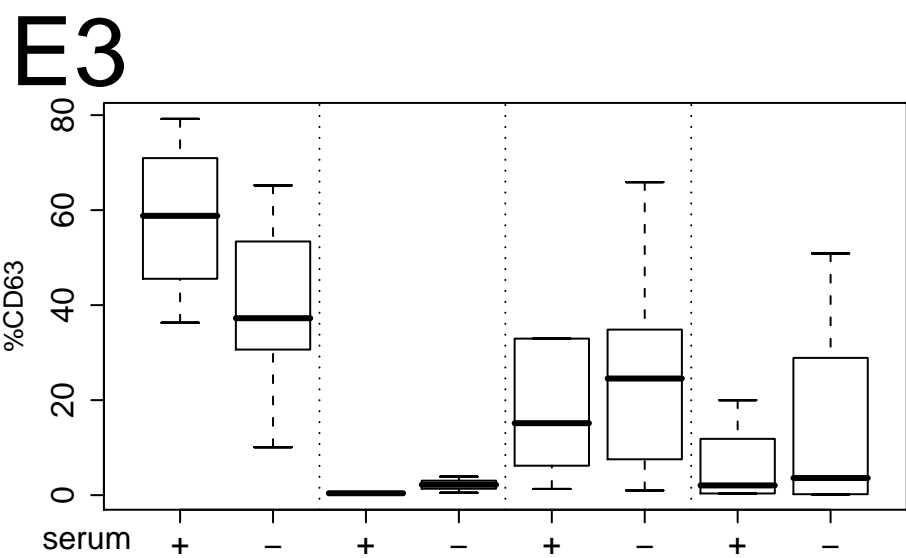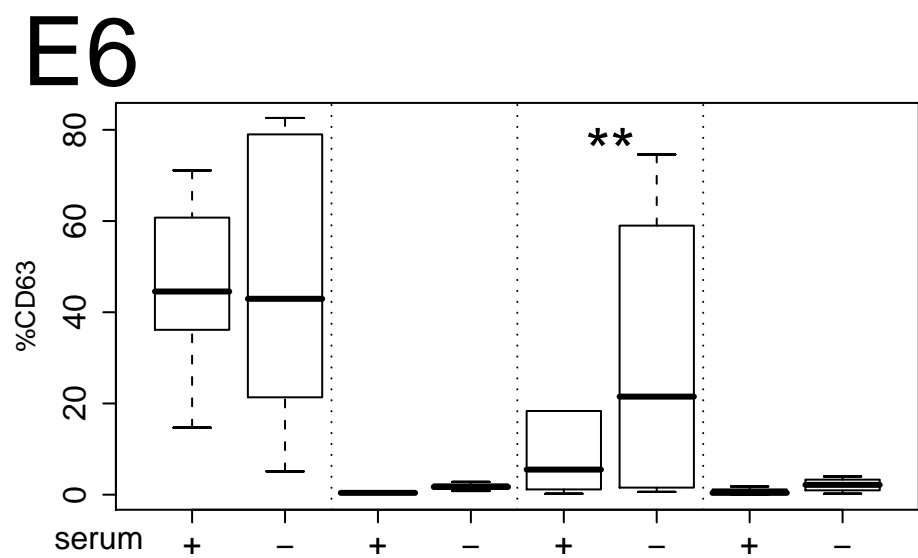

Supplement: NIHMS109169-supplement-06.pdf [file NIHMS109169-supplement-06.pdf]

**E6**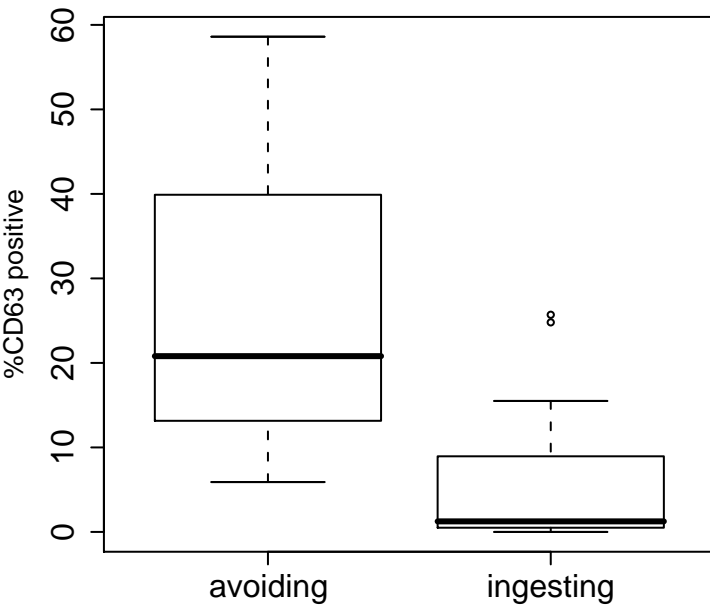**PST**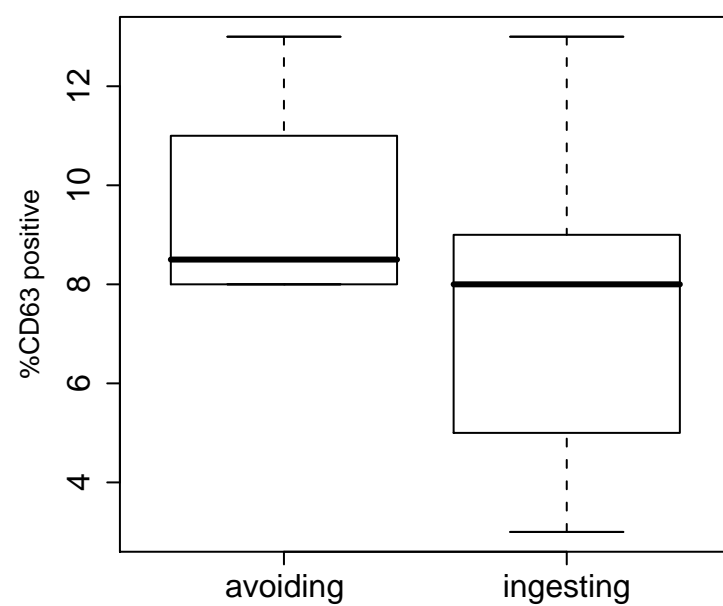**sIgE**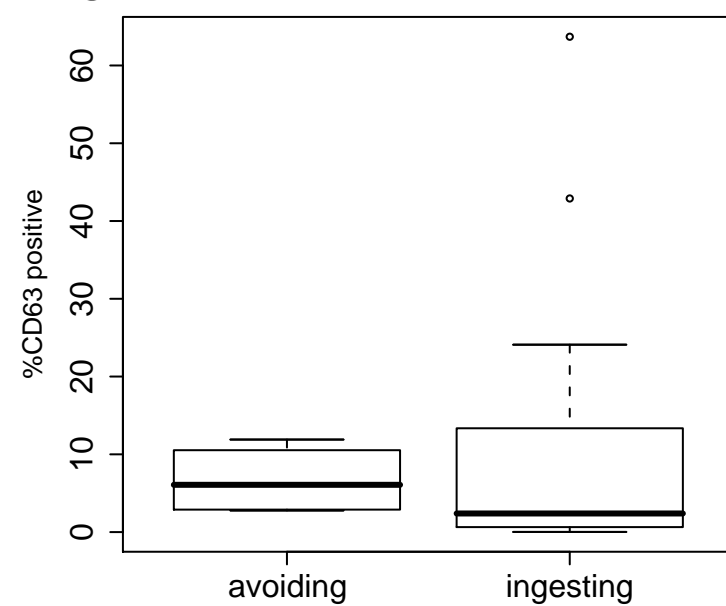**IgG4**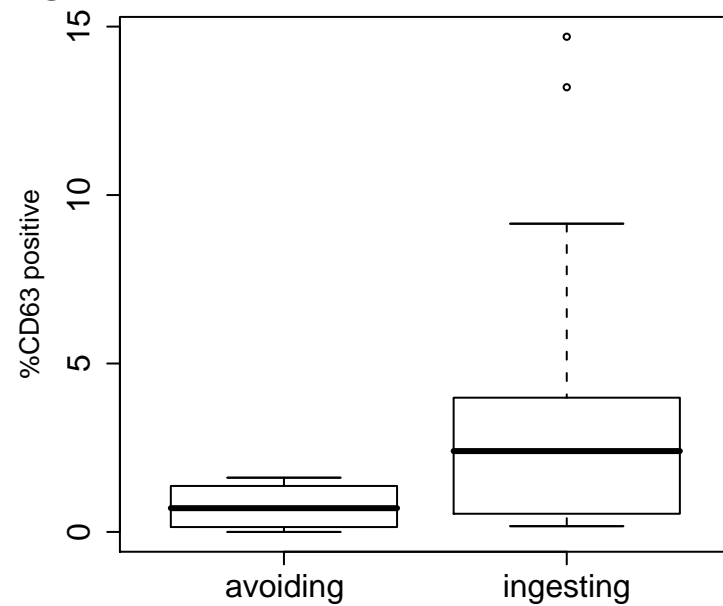

Supplement: NIHMS109169-supplement-07.pdf [file NIHMS109169-supplement-07.pdf]

# IL-3

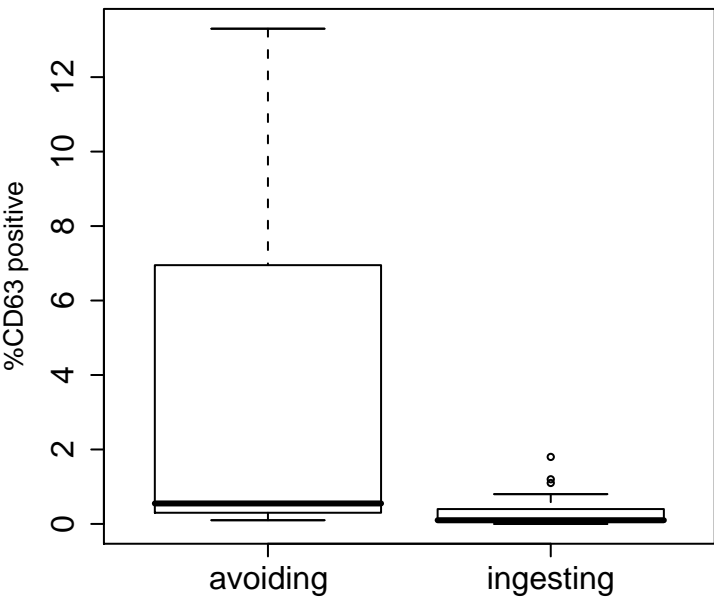

# anti-IgE

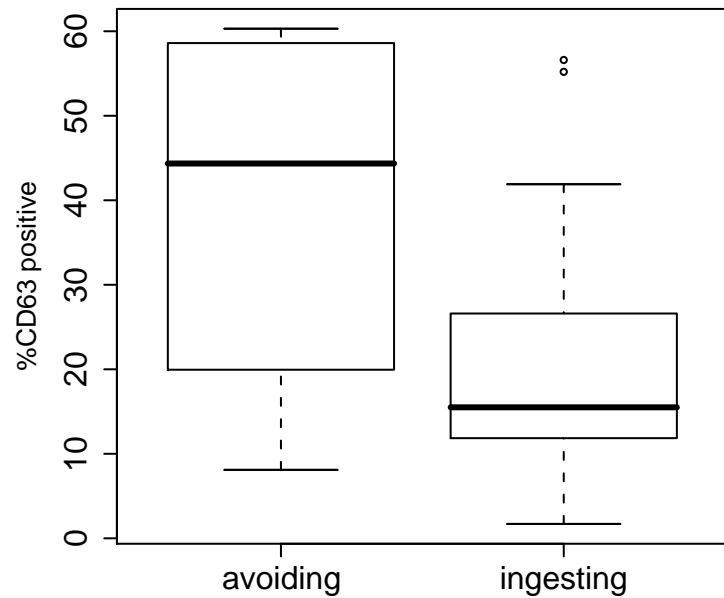

# fMLP

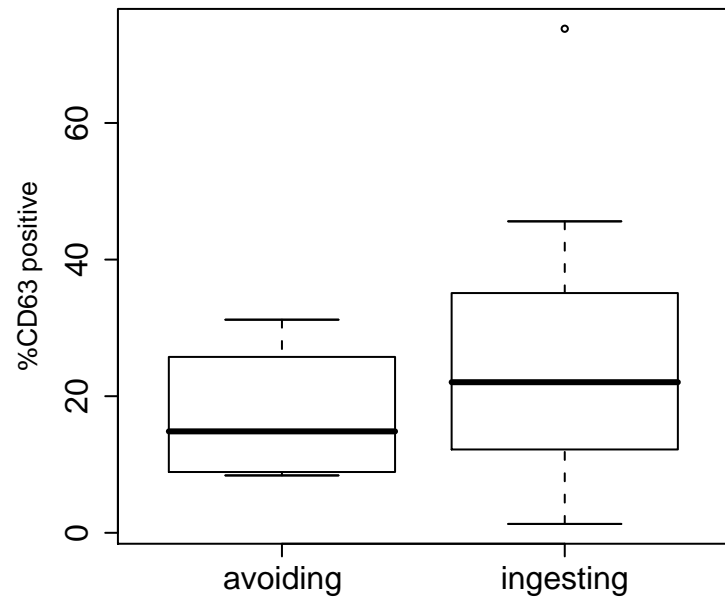

Supplement: NIHMS109169-supplement-08.pdf [file NIHMS109169-supplement-08.pdf]

CONTROL

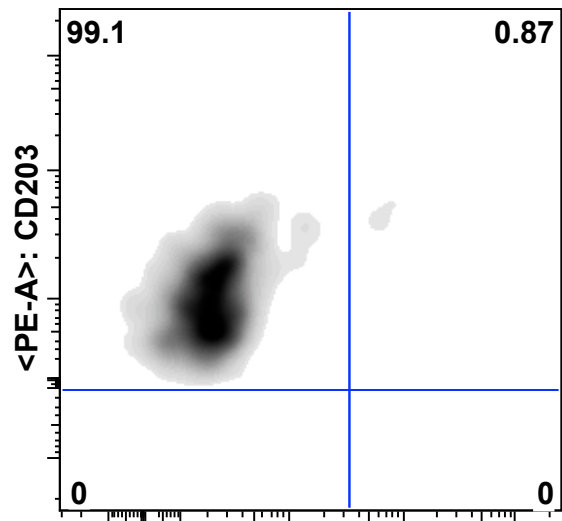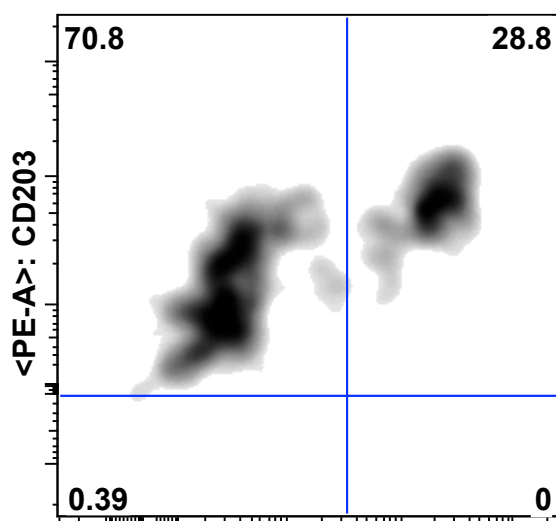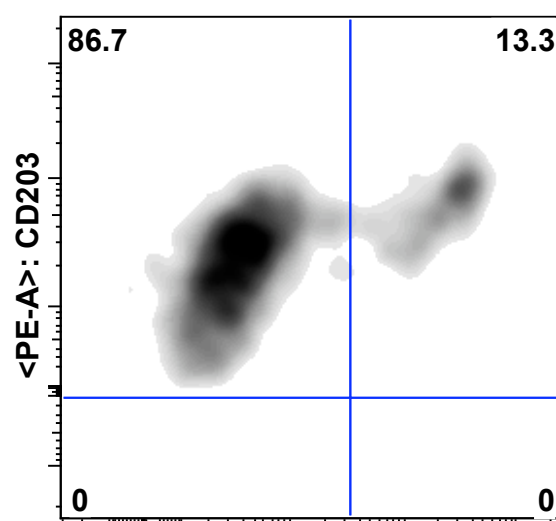

IgG depleted

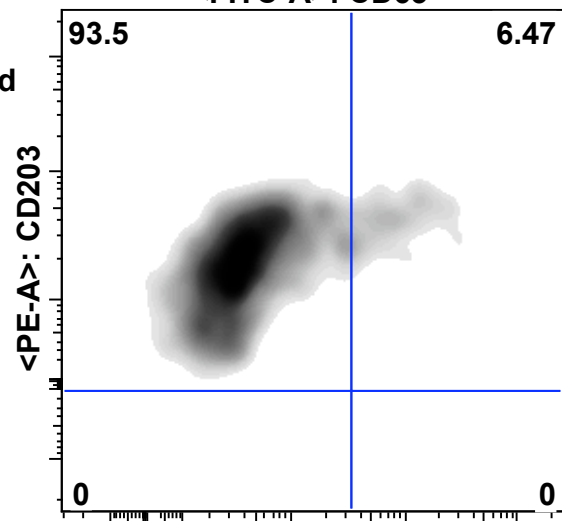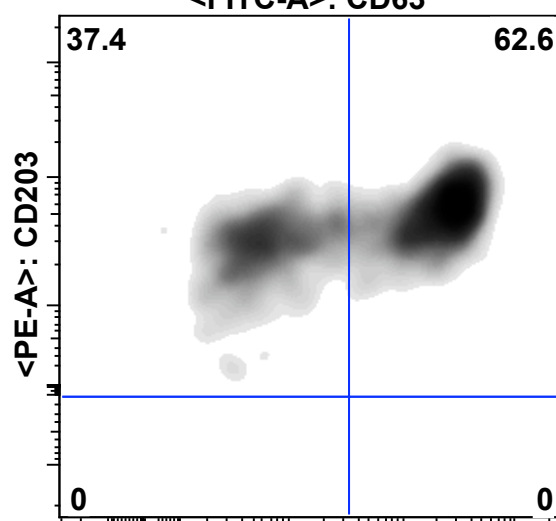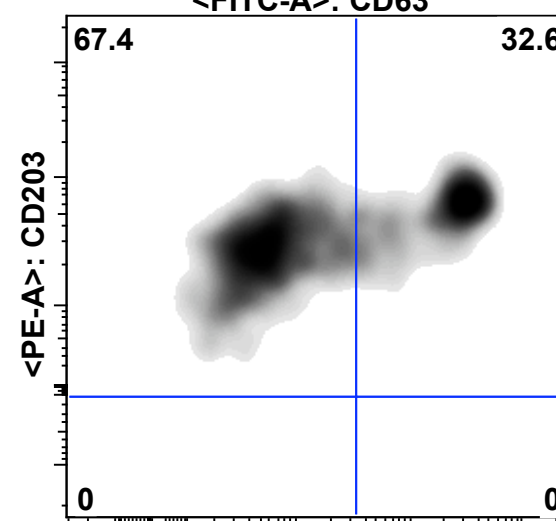

CONTROL

anti-IgE

Milk E4

### IL-3

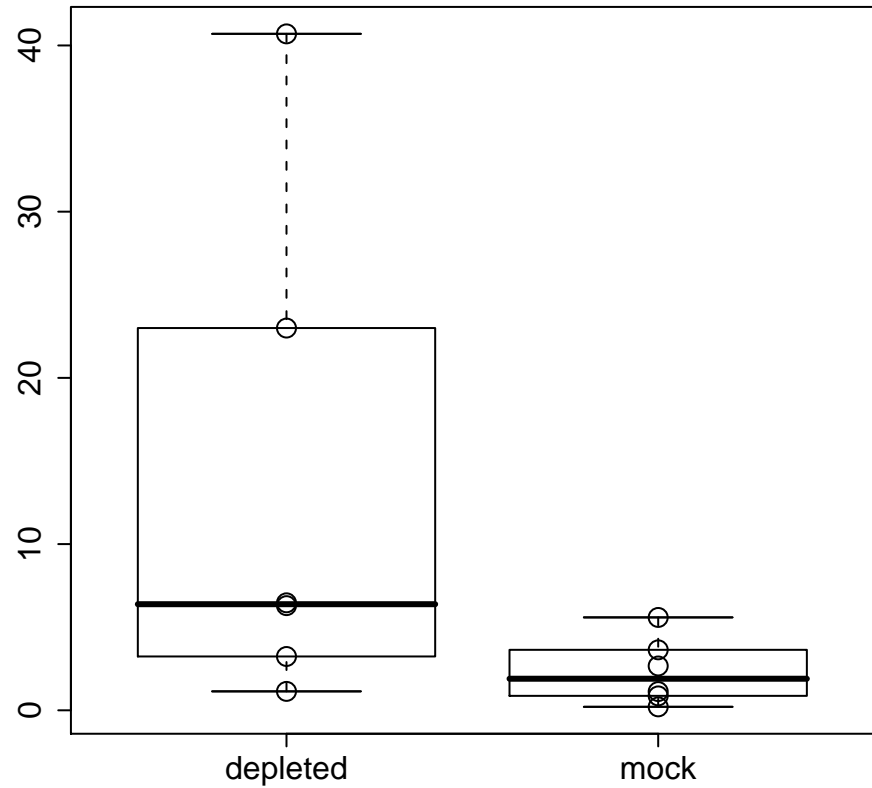

### E4

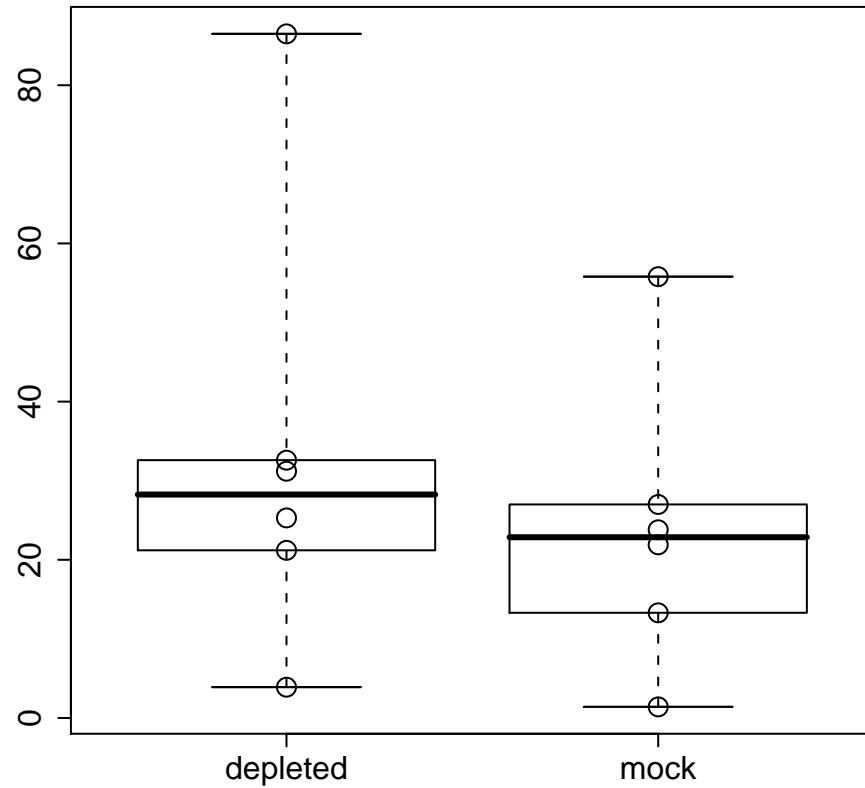

### anti-IgE

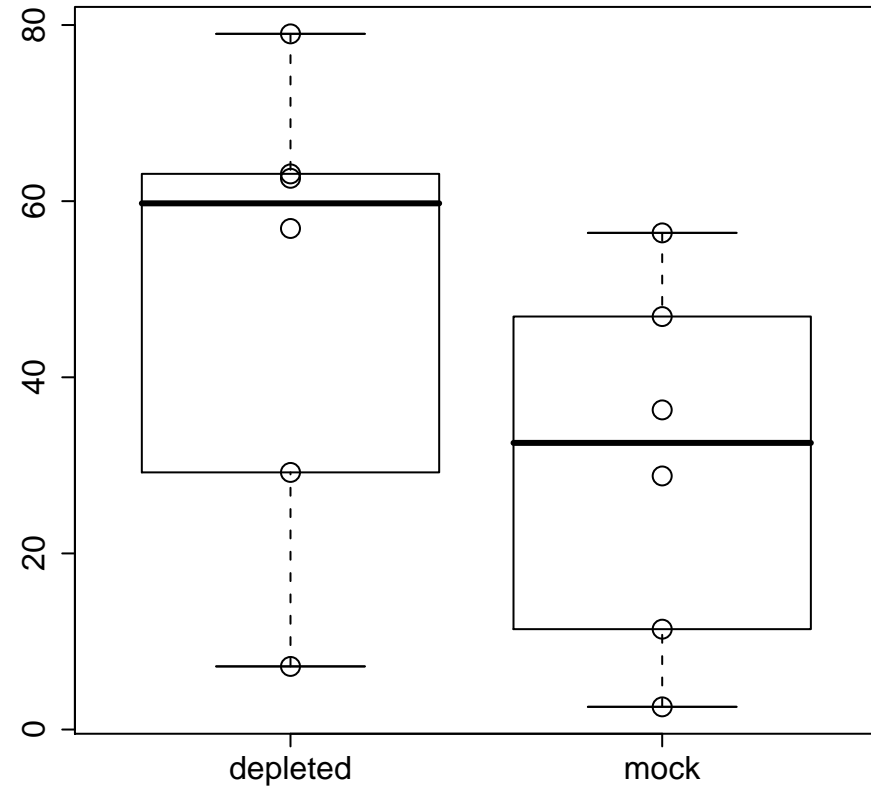

Supplement: NIHMS109169-supplement-09.pdf [file NIHMS109169-supplement-09.pdf]
